# Supplementary material for: A nanosized metal–organic framework with small pores for kinetic xenon separation
Source: Royal Society of Chemistry journal article supplement (doi:10.1039/c8ta03509a), 2018-01-01
Supplement: c8ta03509a1.pdf [file c8ta03509a1.pdf]

## Supporting Information

# Nanosized Metal Organic Framework with Small Pores for Kinetic Xenon Separation

Guangli Yu,<sup>a</sup> Yueqiao Liu,<sup>a</sup> Xiaoqin Zou,<sup>\*a</sup> Nian Zhao,<sup>b</sup> Huazhen Rong<sup>a</sup> and Guangshan Zhu<sup>\*a</sup>

<sup>a</sup> Faculty of Chemistry, Northeast Normal University, Changchun 130024, P. R. China

<sup>b</sup> Institute for Advanced Materials, Hubei Normal University, Huangshi 435002, P. R. China

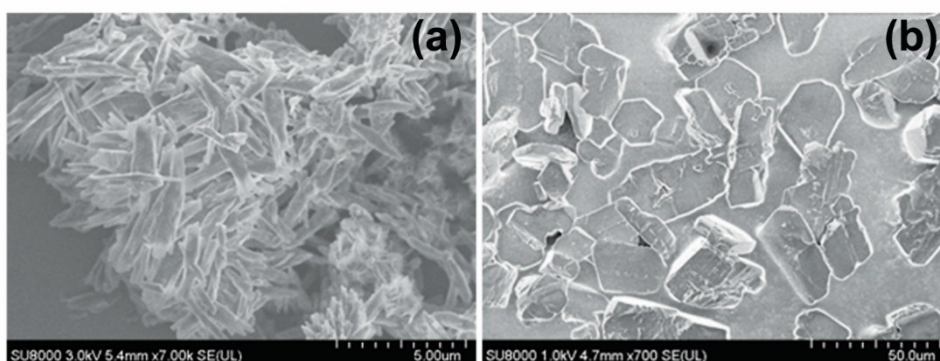

**Fig. S1** SEM images of micro- (a) and macro-crystals (b) prepared by varying  $\text{NH}_3$  contents in the synthesis solutions.

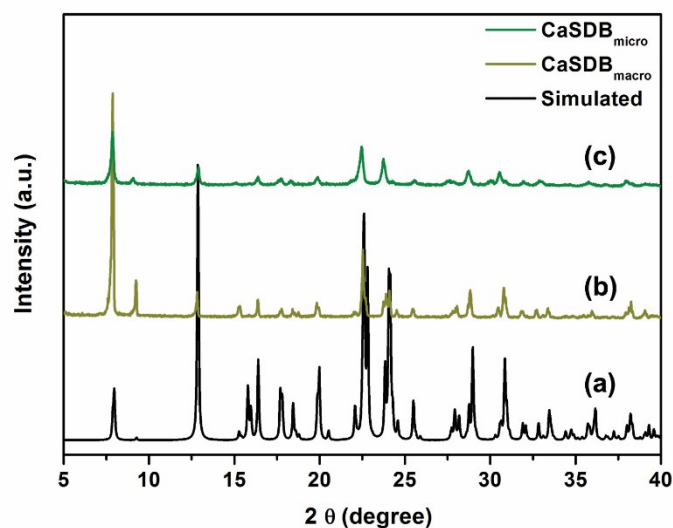

**Fig. S2** XRD patterns of micro- (c) and macro-crystals (b) prepared by varying  $\text{NH}_3$  contents in the synthesis solutions, and (a) refers to the simulated pattern from the single crystal.

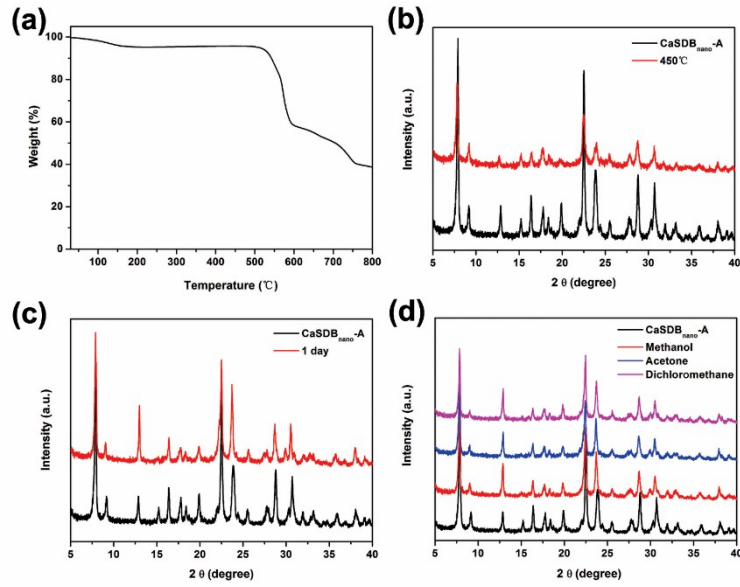

**Fig. S3** TG curve of prepared CaSDB<sub>nano</sub> MOF material (a), and XRD patterns of the CaSDB<sub>nano</sub> sample calcined at 450 °C after 2 h (b), soaked in water for 1 d (c) and immersed in different organic solvents for 1 d (d).

**Table S1** A summary of N<sub>2</sub> sorption results for CaSDB nanocrystals.

| Sample                   | S <sub>BET</sub><br>(m <sup>2</sup> g <sup>-1</sup> ) | S <sub>ext</sub><br>(m <sup>2</sup> g <sup>-1</sup> ) | V <sub>total</sub> <sup>[a]</sup><br>(cm <sup>3</sup> g <sup>-1</sup> ) | V <sub>ultramicro</sub> <sup>[b]</sup><br>(cm <sup>3</sup> g <sup>-1</sup> ) | Pore size <sup>[c]</sup><br>(nm) |
|--------------------------|-------------------------------------------------------|-------------------------------------------------------|-------------------------------------------------------------------------|------------------------------------------------------------------------------|----------------------------------|
| CaSDB <sub>nano</sub> -A | 157                                                   | 104                                                   | 0.19                                                                    | 0.027                                                                        | 0.5                              |
| CaSDB <sub>nano</sub> -B | 140                                                   | 102                                                   | 0.15                                                                    | 0.02                                                                         | 0.5                              |

[a] total pore volumes at P/P<sub>0</sub>=0.95.

[b] ultramicropore volumes calculated by t-plot method with diameter ≤0.7 nm.

[c] pore size distribution in diameter determined using the DFT method.

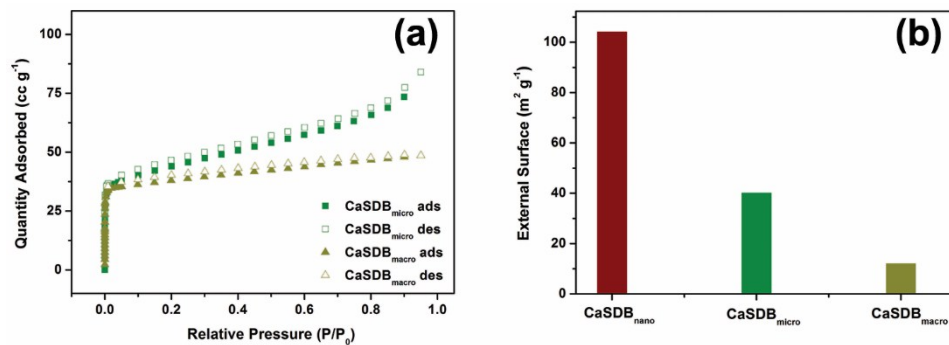

**Fig. S4** (a) N<sub>2</sub> sorption isotherms for CaSDB<sub>micro</sub> and CaSDB<sub>macro</sub>; and (b) external surface areas of CaSDB<sub>nano</sub> prepared by Route A, CaSDB<sub>micro</sub> and CaSDB<sub>macro</sub> samples.

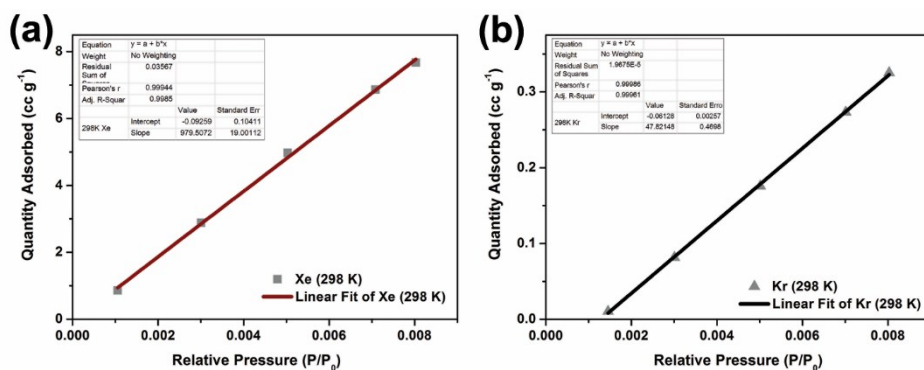

Fig. S5 Fittings of Henry's constants from Xe and Kr adsorption isotherms.

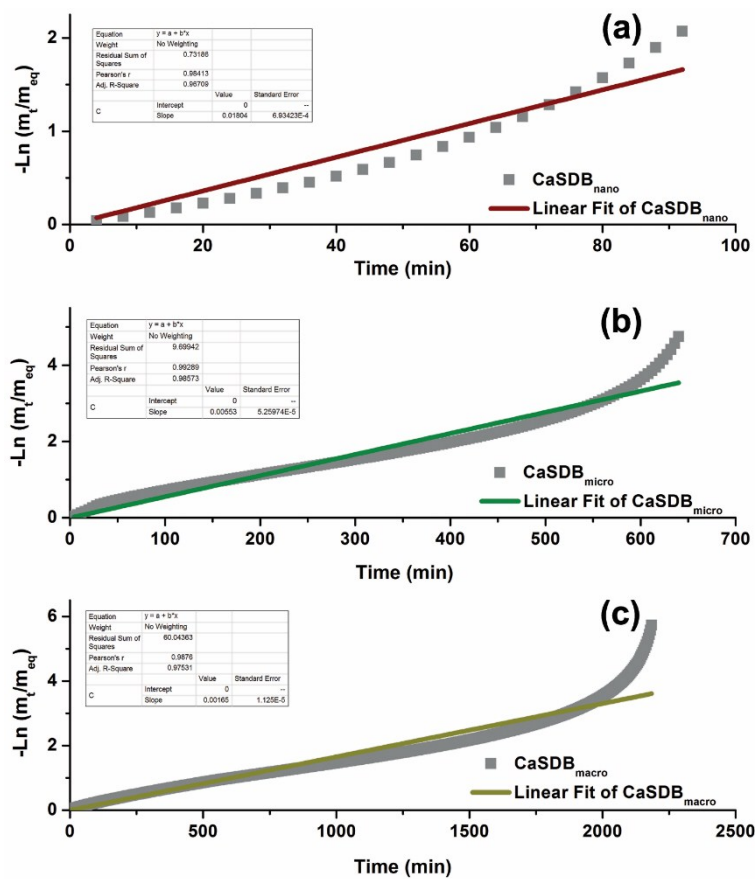

Fig. S6 Fittings of apparent rate constants using the pseudo-first order model.
